# Supplementary material
Source: Springer Nature journal article supplement (https://www.springermedizin.de/resource/supplementary/13256_2007_135_MOESM3_ESM.pdf/9645346)

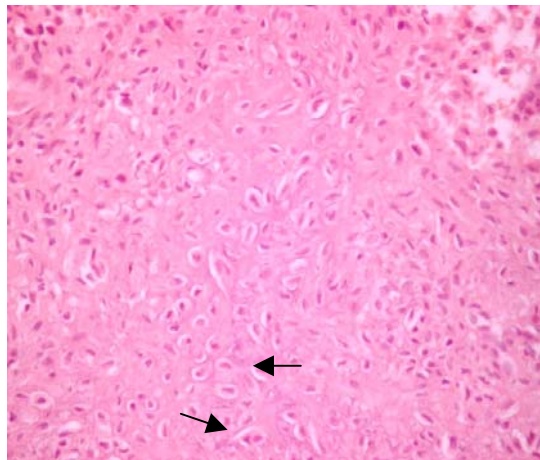

(a)

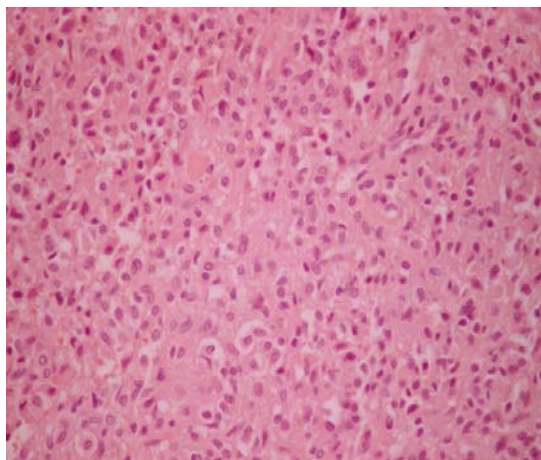

(b)

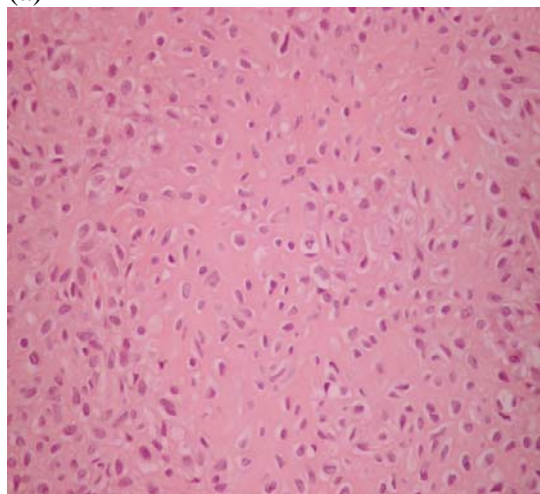

(c)

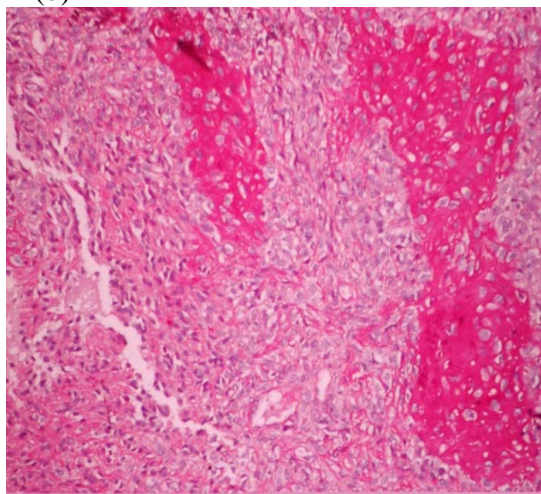

(d)

Supplement: MOESM3 [file 9645346]
